# Supplementary material for: MBIP promotes ESCC metastasis by activating MAPK pathway
Source: Research Square preprint supplement (doi:10.21203/rs.3.rs-3367778/v1), 2023-09-26

Table 1  Primers for qRT-PCR

| Genes | Forward | Reveise |
| --- | --- | --- |
| E-cadherin | GAGTGCCAACTGGACCATTC | ACCCACCTCTAAGGCCATCT |
| N-cadherin | GTGCATGAAGGACAGCCTCT | TCTCACGGCATACACCATGC |
| Vimentin | ACGTCTTGACCTTGAACGCA | TCTTGGCAGCCACACTTTCA |
| Slug | TGTGACAAGGAATATGTGAGCC | TGAGCCCTCAGATTTGACCTG |
| Twist | GTCCGCAGTCTTACGAGGAG | GCTTGAGGGTCTGAATCTTGCT |
| MBIP | CATACGGACCACAGACTAGACC | ATGTCTCTTGGCACTGGACCAC |
| GAPDH | GAAGGTGAAGGTCGGAGTC | GAAGATGGTGATGGGATTTC |

Figure Legends:

Fig.S1. Prognostic analysis of ESCC patients using Kaplan-Maier curves based on risk score models including gender, age, drinking, smoking, grade, tumor location, T stage and N stage.

Fig.S2. Correlation analysis of mRNA expression between MBIP and EMT mark genes in 179 ESCC patients from GSE53625 database (https://www.ncbi.nlm.nih.gov/geo/query/acc.cgi?acc=GSE53625).

Fig.S1.


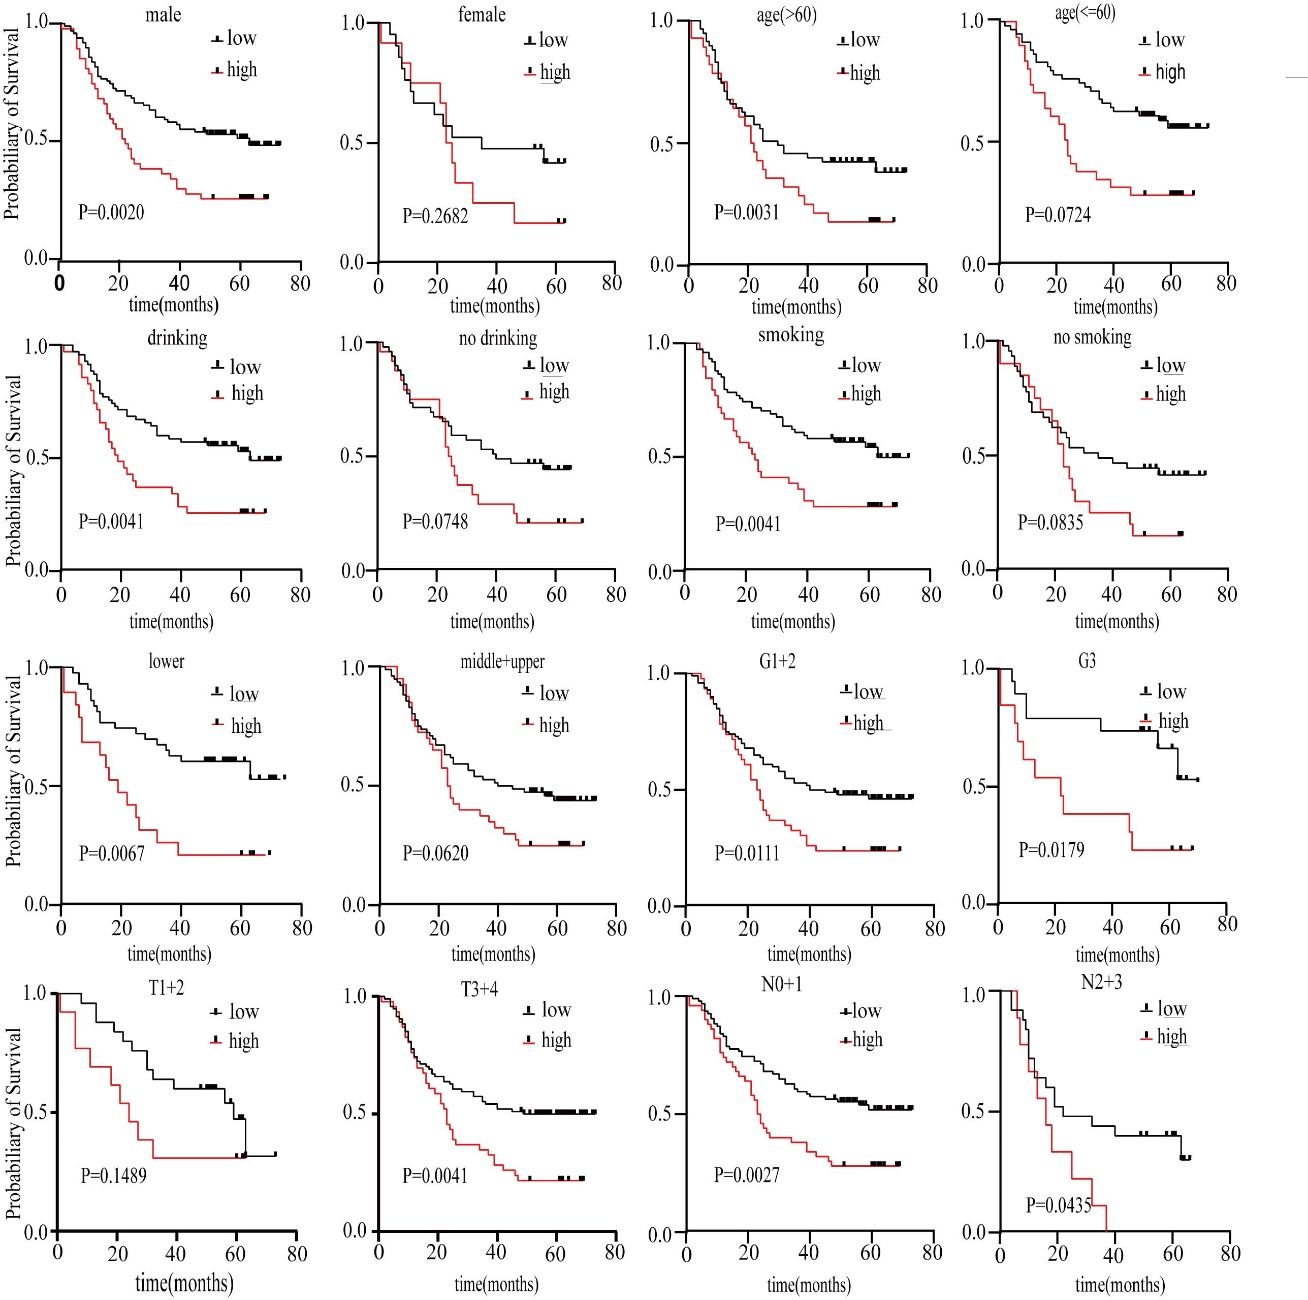


Fig.S2.


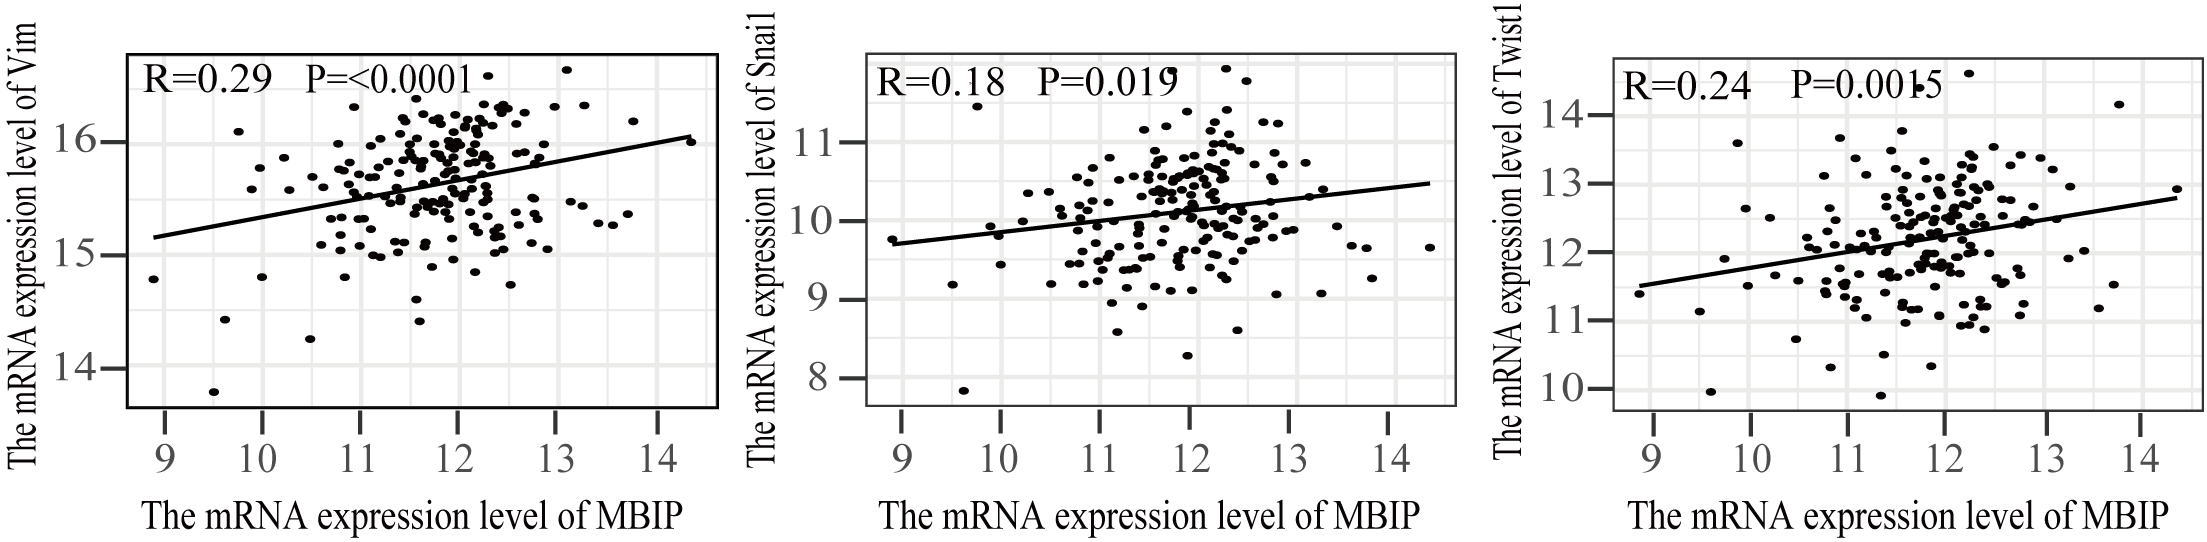

Supplement: Supplementary file 1 [file fc9764076b34c74df5a0101d.docx]
